# Supplementary material for: Large-scale benchmarking reveals false discoveries and count transformation sensitivity in 16S rRNA gene amplicon data analysis methods used in microbiome studies
Source: PubMed Central journal article supplement (PMC5123278; doi:10.1186/s40168-016-0208-8), 2016-11-25

Area under the ROC curve (AUC),  
mixed multiplicative spiking

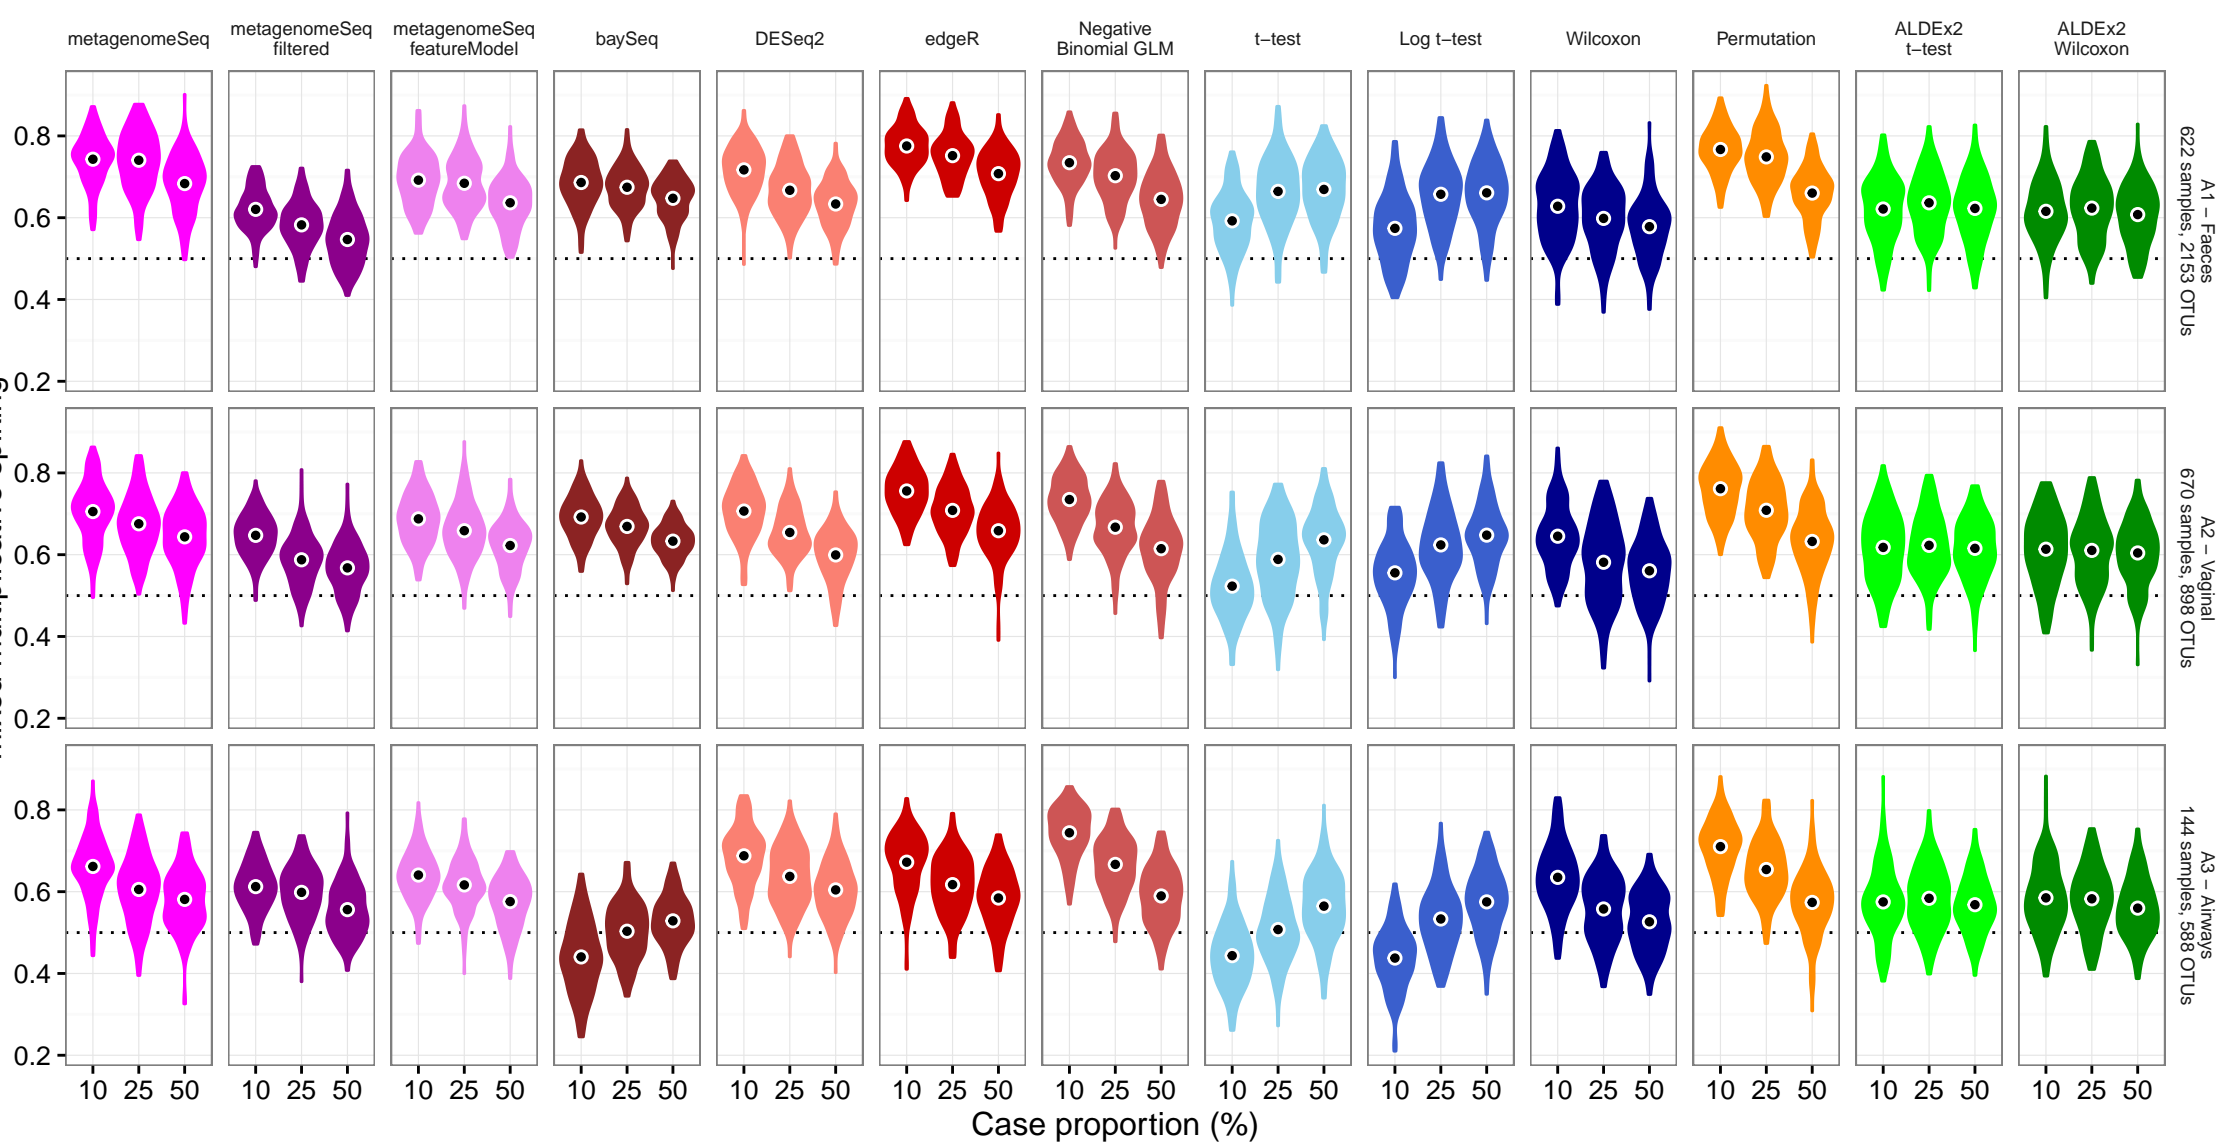

Supplement: 40168_2016_208_MOESM6_ESM.pdf [file 40168_2016_208_MOESM6_ESM.pdf]
