# Supplementary material for: Large-scale benchmarking reveals false discoveries and count transformation sensitivity in 16S rRNA gene amplicon data analysis methods used in microbiome studies
Source: PubMed Central journal article supplement (PMC5123278; doi:10.1186/s40168-016-0208-8), 2016-11-25
Supplement: 40168_2016_208_MOESM10_ESM.pdf [file 40168_2016_208_MOESM10_ESM.pdf]

**A**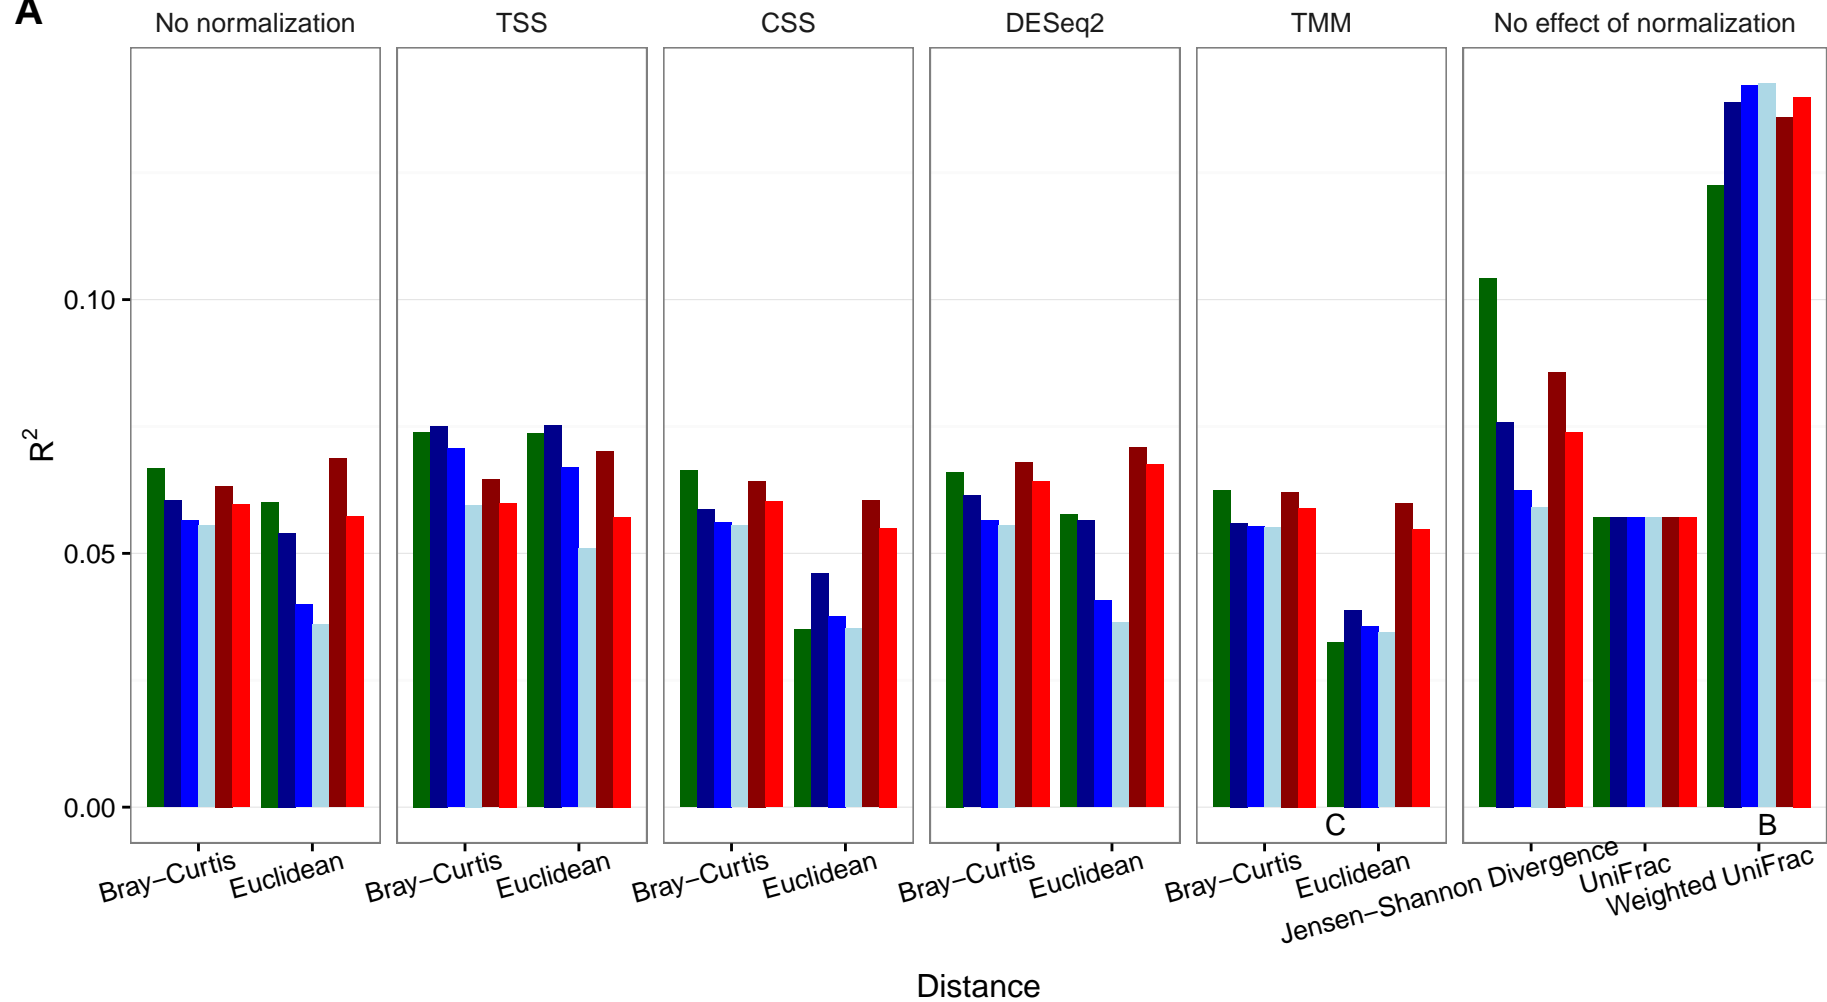**B**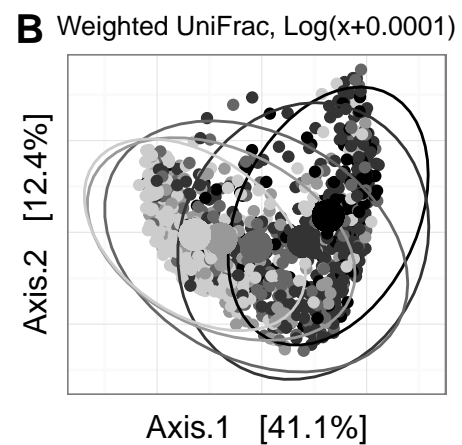**C**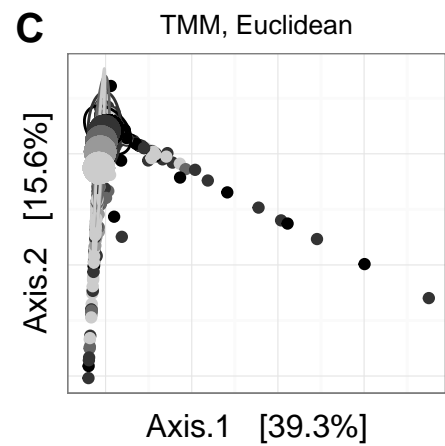

Transformation

|      |          |             |               |         |          |
|------|----------|-------------|---------------|---------|----------|
| None | Log(x+1) | Log(x+0.01) | Log(x+0.0001) | Sqrt(x) | Cubrt(x) |
|------|----------|-------------|---------------|---------|----------|
