# Supplementary material for: Large-scale benchmarking reveals false discoveries and count transformation sensitivity in 16S rRNA gene amplicon data analysis methods used in microbiome studies
Source: PubMed Central journal article supplement (PMC5123278; doi:10.1186/s40168-016-0208-8), 2016-11-25
Supplement: 40168_2016_208_MOESM11_ESM.pdf [file 40168_2016_208_MOESM11_ESM.pdf]

|                        |                                                      |
|------------------------|------------------------------------------------------|
| T-test                 | - Assumes a gaussian distribution                    |
|                        | - FPR: Robust across the range                       |
|                        | - AUC performance: Low                               |
|                        | - AUC robustness: Low                                |
|                        | - Balance sensitivity: Sensitive to balanced studies |
|                        | - Computational burden: very fast                    |
| Log t-test             | - Assumes a log-gaussian distribution                |
|                        | - FPR: Robust across the range                       |
|                        | - AUC performance: Low                               |
|                        | - AUC robustness: Low                                |
|                        | - Balance sensitivity: Sensitive to balanced studies |
|                        | - Computational burden: very fast                    |
| Wilcoxon rank sum test | - No distributional assumptions, uses ranks          |
|                        | - FPR: Robust across the range                       |
|                        | - AUC performance: Low                               |
|                        | - AUC robustness: Low                                |
|                        | - Balance sensitivity: Low                           |
|                        | - Computational burden: Very fast                    |
| Negative binomial GLM  | - Assumes a negative binomial distribution           |
|                        | - FPR: Robust, conservative with high sparsity       |
|                        | - AUC performance: Medium                            |
|                        | - AUC robustness: High                               |
|                        | - Balance sensitivity: Low                           |
|                        | - Computational burden: Medium                       |
| DEseq2                 | - Assumes a negative binomial distribution           |

|                             |                                                                                                                                                       |
|-----------------------------|-------------------------------------------------------------------------------------------------------------------------------------------------------|
|                             | <ul style="list-style-type: none"> <li>- FPR: Robust, very conservative with high sparsity</li> </ul>                                                 |
|                             | <ul style="list-style-type: none"> <li>- AUC performance: Medium</li> </ul>                                                                           |
|                             | <ul style="list-style-type: none"> <li>- AUC robustness: Medium</li> </ul>                                                                            |
|                             | <ul style="list-style-type: none"> <li>- Balance sensitivity: Low</li> </ul>                                                                          |
|                             | <ul style="list-style-type: none"> <li>- Computational burden: Slow</li> </ul>                                                                        |
| edgeR                       | <ul style="list-style-type: none"> <li>- Assumes a negative binomial distribution</li> </ul>                                                          |
|                             | <ul style="list-style-type: none"> <li>- FPR: Inflated</li> </ul>                                                                                     |
|                             | <ul style="list-style-type: none"> <li>- AUC performance: Good</li> </ul>                                                                             |
|                             | <ul style="list-style-type: none"> <li>- AUC robustness: Medium</li> </ul>                                                                            |
|                             | <ul style="list-style-type: none"> <li>- Balance sensitivity: Low</li> </ul>                                                                          |
|                             | <ul style="list-style-type: none"> <li>- Computational burden: Medium</li> </ul>                                                                      |
| baySeq                      | <ul style="list-style-type: none"> <li>- Assumes a negative binomial distribution, bayesian inference</li> </ul>                                      |
|                             | <ul style="list-style-type: none"> <li>- FPR: Inflated</li> </ul>                                                                                     |
|                             | <ul style="list-style-type: none"> <li>- AUC performance: Good</li> </ul>                                                                             |
|                             | <ul style="list-style-type: none"> <li>- AUC robustness: Medium</li> </ul>                                                                            |
|                             | <ul style="list-style-type: none"> <li>- Balance sensitivity: Low</li> </ul>                                                                          |
|                             | <ul style="list-style-type: none"> <li>- Computational burden: Very slow</li> </ul>                                                                   |
| ALDEx2                      | <ul style="list-style-type: none"> <li>- Assumes gaussian (t-test) or no assumptions (Wilcoxon) when testing Dirichlet Monte Carlo samples</li> </ul> |
|                             | <ul style="list-style-type: none"> <li>- FPR: Conservative</li> </ul>                                                                                 |
|                             | <ul style="list-style-type: none"> <li>- AUC performance: Medium</li> </ul>                                                                           |
|                             | <ul style="list-style-type: none"> <li>- AUC robustness: Medium</li> </ul>                                                                            |
|                             | <ul style="list-style-type: none"> <li>- Balance sensitivity: Low</li> </ul>                                                                          |
|                             | <ul style="list-style-type: none"> <li>- Computational burden: Very slow</li> </ul>                                                                   |
| metagenomeSeq ZIG, filtered | <ul style="list-style-type: none"> <li>- Assumes a log-gaussian distribution</li> </ul>                                                               |
|                             | <ul style="list-style-type: none"> <li>- FPR: Slightly inflated</li> </ul>                                                                            |

|                                |                                                                                                                     |
|--------------------------------|---------------------------------------------------------------------------------------------------------------------|
|                                | <ul style="list-style-type: none"> <li>- AUC performance: Good</li> </ul>                                           |
|                                | <ul style="list-style-type: none"> <li>- AUC robustness: Medium</li> </ul>                                          |
|                                | <ul style="list-style-type: none"> <li>- Balance sensitivity: Sensitive to unbalanced studies</li> </ul>            |
|                                | <ul style="list-style-type: none"> <li>- Computational burden: Fast</li> </ul>                                      |
| metagenomeSeq,<br>featureModel | <ul style="list-style-type: none"> <li>- Assumes a log-gaussian distribution</li> </ul>                             |
|                                | <ul style="list-style-type: none"> <li>- FPR: Robust, very conservative with high sparsity</li> </ul>               |
|                                | <ul style="list-style-type: none"> <li>- AUC performance: Good</li> </ul>                                           |
|                                | <ul style="list-style-type: none"> <li>- AUC robustness: High</li> </ul>                                            |
|                                | <ul style="list-style-type: none"> <li>- Balance sensitivity: Low</li> </ul>                                        |
|                                | <ul style="list-style-type: none"> <li>- Computational burden: Fast</li> </ul>                                      |
| Permutation test               | <ul style="list-style-type: none"> <li>- No distributional assumptions</li> </ul>                                   |
|                                | <ul style="list-style-type: none"> <li>- FPR: Robust across the range</li> </ul>                                    |
|                                | <ul style="list-style-type: none"> <li>- AUC performance: Medium</li> </ul>                                         |
|                                | <ul style="list-style-type: none"> <li>- AUC robustness: High</li> </ul>                                            |
|                                | <ul style="list-style-type: none"> <li>- Balance sensitivity: Low</li> </ul>                                        |
|                                | <ul style="list-style-type: none"> <li>- Computational burden: Slow, depending on number of permutations</li> </ul> |
